# Supplementary material for: Aroma Compound Changes in the Jiangxiangxing Baijiu Solid-State Distillation Process: Description, Kinetic Characters and Cut Point Selection
Source: MDPI journal article supplement (doi:10.3390/foods13020232), 2024-01-11
Supplement: s1 [file s1]

## Supplementary Information

### AROMA COMPOUNDS CHANGES OF JIANGXIANGXING BAIJIU SOLID-STATE DISTILLATION PROCESS : DESCRIPTION, KINETIC CHARACTERISTICS AND CUT POINTS SELECTION

Yuchen Gao<sup>a</sup>, Qiang Yang<sup>b</sup>, Guangyuan Jin<sup>a</sup>, Shengzhi Yang<sup>b</sup>, Ruiyang Qin<sup>a</sup>, Linjie Lyu<sup>b</sup>, Xianze Yao<sup>b</sup>, Rongzhen Zhang<sup>a</sup>,  
Shuang Chen<sup>a</sup> and Yan Xu<sup>a\*</sup>

<sup>a</sup> Lab of Brewing Microbiology and Applied Enzymology, Key Laboratory of Industrial Biotechnology of Ministry of Education, State Key Laboratory of Food Science & Technology & School of Biotechnology, Jiangnan University, Wuxi 214122, Jiangsu, China

<sup>b</sup> Jing Brand Co., Ltd, HuangShi, HuBei 435100, China

\* corresponding author: [yxu@jiangnan.edu.cn](mailto:yxu@jiangnan.edu.cn)

Table S1. Aroma compounds concentration (µg/L) change in distillation

| No. | Aroma Compounds                       | 0min        | 6min        | 12min       | 18min      | 24min      | 30min      | 36min      | 42min      | 48min      | 54min      |
|-----|---------------------------------------|-------------|-------------|-------------|------------|------------|------------|------------|------------|------------|------------|
| 1   | ethanol <sup>a</sup>                  | 75.52       | 66.42       | 52.37       | 35.45      | 23.67      | 14.50      | 9.18       | 5.93       | 3.98       | 2.58       |
| 2   | 2-methylpropanoic acid <sup>f</sup>   | nd          | nd          | nd          | 223.07     | 362.00     | 1974.18    | 3666.17    | 4945.75    | 4536.95    | 4437.21    |
| 3   | propanoic acid <sup>f</sup>           | 12187.28    | 11741.00    | 23282.90    | 37787.14   | 50815.98   | 61545.99   | 68393.18   | 82169.89   | 77534.73   | 76354.57   |
| 4   | butanoic acid <sup>f</sup>            | nd          | nd          | nd          | 441.00     | 1954.68    | 2463.73    | 3213.81    | 3457.41    | 3377.71    | 3683.30    |
| 5   | heptanoic acid <sup>s</sup>           | nd          | nd          | nd          | nd         | nd         | 9.07       | 11.04      | 20.84      | 24.94      | 26.46      |
| 6   | hexanoic acid <sup>f</sup>            | nd          | nd          | nd          | nd         | 298.44     | 663.90     | 2562.87    | 3761.96    | 4204.12    | 5239.99    |
| 7   | pentanoic acid <sup>s</sup>           | 16.35       | 1.98        | 3.30        | 19.63      | 78.98      | 219.33     | 130.41     | 151.97     | 142.11     | 177.43     |
| 8   | octanoic acid <sup>f</sup>            | nd          | nd          | nd          | nd         | 0.83       | 4.74       | 6.02       | 8.83       | 11.65      | 12.07      |
| 9   | acetic acid <sup>f</sup>              | 9486.95     | 10959.30    | 19409.54    | 31446.05   | 45295.86   | 46132.44   | 42628.29   | 44125.56   | 41401.52   | 43728.14   |
| 10  | 1-propanol <sup>f</sup>               | 1081113.65  | 1175681.55  | 1421463.11  | 1348806.64 | 1163167.78 | 990802.95  | 526167.84  | 349863.54  | 250587.37  | 183747.65  |
| 11  | 1-butanol <sup>f</sup>                | 19042.84    | 20751.83    | 17229.24    | 10720.45   | 5708.06    | 4970.84    | 3654.77    | 2445.39    | 2181.49    | 1081.70    |
| 12  | 1-hexanol <sup>f</sup>                | 3708.69     | 6572.66     | 5628.25     | 4854.21    | 4271.48    | 7259.51    | 6496.18    | 6355.74    | 3667.78    | 2631.64    |
| 13  | 2-phenylethyl acetate <sup>f</sup>    | nd          | nd          | nd          | 223.07     | 362.00     | 1974.18    | 3666.17    | 4945.75    | 4536.95    | 4437.21    |
| 14  | ethyl 3-phenylpropanoate <sup>s</sup> | 4.72        | 21.76       | 27.17       | 41.19      | 56.12      | 79.79      | 58.03      | 56.29      | 53.16      | 46.59      |
| 15  | phenylacetaldehyde <sup>s</sup>       | nd          | 319.92      | 1339.88     | 4496.84    | 11297.72   | 18662.16   | 17469.86   | 18211.97   | 20110.76   | 18554.07   |
| 16  | acetaldehyde <sup>f</sup>             | 112918.17   | 206289.69   | 162624.65   | 134327.14  | 101582.54  | 84257.37   | 59285.76   | 52699.81   | 50014.81   | 43952.36   |
| 17  | ethyl 3-methylbutanoate <sup>f</sup>  | 10049.51    | 7201.11     | 5391.24     | 3794.34    | 3616.68    | 3447.17    | 3032.58    | 2099.64    | 1639.59    | 1207.14    |
| 18  | benzaldehyde <sup>f</sup>             | 5521.49     | 7178.54     | 10927.56    | 18331.11   | 22884.20   | 31317.67   | 36877.83   | 40591.29   | 39409.78   | 35522.71   |
| 19  | 2-phenylethanol <sup>f</sup>          | 2753.52     | 3473.51     | 7080.91     | 12048.58   | 15387.29   | 21346.33   | 23943.27   | 24289.26   | 25129.14   | 22079.49   |
| 20  | ethyl phenylacetate <sup>f</sup>      | 211.84      | 9363.00     | 6599.84     | 3663.65    | 894.08     | 597.77     | 541.39     | nd         | nd         | nd         |
| 21  | ethyl butanoate <sup>f</sup>          | 37867951.60 | 27505790.74 | 16094245.43 | 9765340.98 | 5703925.20 | 4212858.30 | 4313695.47 | 3301365.26 | 2799594.36 | 2325769.98 |
| 22  | ethyl heptanoate <sup>s</sup>         | 2.58        | 4.75        | 3.23        | 4.77       | 5.69       | 4.28       | 2.81       | 2.13       | 2.01       | 1.30       |
| 23  | butyl hexanoate <sup>f</sup>          | 307.09      | 583.08      | 272.60      | nd         |
| 24  | ethyl hexanoate <sup>f</sup>          | 51492.06    | 43667.26    | 30842.41    | 21670.07   | 14413.02   | 7156.35    | 8272.89    | 6316.03    | 6070.21    | 5330.91    |
| 25  | furfural <sup>f</sup>                 | 0.00        | 161564.88   | 220332.99   | 296495.40  | 365511.46  | 444466.91  | 484220.83  | 478324.81  | 453575.01  | 405808.85  |
| 26  | ethyl lactate <sup>f</sup>            | 14847.04    | 27942.63    | 48179.02    | 56476.27   | 43471.19   | 30683.96   | 25562.49   | 21165.05   | 20708.62   | 19342.10   |
| 27  | ethyl dodecanoate <sup>s</sup>        | 29.17       | 60.86       | 44.27       | 21.80      | 22.12      | 16.32      | 11.56      | 3.11       | 3.01       | 1.87       |
| 28  | ethyl tetradecanoate <sup>f</sup>     | 1269.39     | 1242.93     | 867.29      | 225.70     | nd         | nd         | nd         | nd         | nd         | nd         |

|    |                                          |           |           |           |           |          |          |          |          |          |          |
|----|------------------------------------------|-----------|-----------|-----------|-----------|----------|----------|----------|----------|----------|----------|
| 29 | ethyl pentanoate <sup>f</sup>            | 4179.12   | 3099.68   | 1859.50   | 1520.03   | 759.74   | 491.27   | 514.87   | 466.02   | 451.23   | 408.93   |
| 30 | ethyl octanoate <sup>f</sup>             | 38346.86  | 28473.23  | 27676.93  | 20288.41  | 11925.52 | 8735.33  | 5765.48  | 4318.08  | 3261.98  | 3140.49  |
| 31 | ethyl acetate <sup>f</sup>               | 257495.05 | 198847.89 | 120702.96 | 84447.80  | 56659.09 | 31607.87 | 25799.83 | 21889.92 | 18698.48 | 15236.24 |
| 32 | 1,1-diethoxyethane <sup>f</sup>          | 557.92    | 512.70    | 483.42    | 386.68    | 261.16   | 152.45   | 161.93   | 121.79   | 105.54   | 103.36   |
| 33 | 1-octanol <sup>s</sup>                   | 0.45      | 19.22     | 27.73     | 41.03     | 63.91    | 92.06    | 127.34   | 153.01   | 161.13   | 164.39   |
| 34 | diethyl butanedioate <sup>s</sup>        | 9.66      | 139.47    | 242.46    | 583.21    | 1160.04  | 1831.78  | 1087.75  | 967.98   | 978.23   | 850.34   |
| 35 | isoamyl butyrate <sup>s</sup>            | 14.38     | 13.71     | 9.19      | 10.39     | 14.68    | 11.16    | 5.83     | 4.35     | 2.53     | 2.59     |
| 36 | propyl hexanoate <sup>s</sup>            | 23.88     | 18.37     | 10.72     | 13.35     | 17.46    | 14.23    | 7.29     | 4.08     | 3.87     | 2.97     |
| 37 | hexyl hexanoate <sup>s</sup>             | 0.27      | 0.50      | 0.37      | 0.63      | 0.36     | 0.60     | 0.13     | 0.07     | 0.13     | 0.03     |
| 38 | ethyl nonanoate <sup>s</sup>             | 87.18     | 71.63     | 70.90     | 84.45     | 115.72   | 90.78    | 52.36    | 28.78    | 24.32    | 17.46    |
| 39 | 2-methylpropyl acetate <sup>s</sup>      | 363.53    | 167.55    | 101.59    | 86.67     | 125.44   | 112.21   | 65.03    | 35.64    | 14.36    | 11.10    |
| 40 | 3-methylbutyl acetate <sup>f</sup>       | 28455.76  | 21709.40  | 14708.74  | 11202.41  | 4666.13  | 3310.23  | 3252.19  | 2672.77  | 2664.46  | 2427.40  |
| 41 | ethyl decanoate <sup>f</sup>             | 34858.36  | 22940.62  | 23879.63  | 17142.33  | 8519.85  | 3698.75  | 2915.80  | 2422.99  | 2799.33  | 2773.72  |
| 42 | 2-methylpropanal <sup>s</sup>            | 184.70    | 105.37    | 69.14     | 90.18     | 267.49   | 359.23   | 248.39   | 240.08   | 249.09   | 194.09   |
| 43 | octan-3-ol <sup>s</sup>                  | 86.75     | 75.55     | 62.76     | 82.26     | 156.87   | 168.77   | 176.39   | 181.68   | 177.60   | 135.35   |
| 44 | 2-methylpropanol <sup>f</sup>            | 32130.46  | 30373.49  | 21904.89  | 13607.54  | 5805.51  | 3791.65  | 3008.82  | 2407.41  | 1951.31  | 1493.51  |
| 45 | pentan-2-ol <sup>f</sup>                 | 2608.17   | 3196.54   | 4399.25   | 1847.02   | nd       | nd       | nd       | nd       | nd       | nd       |
| 46 | 3-methylbutanol <sup>f</sup>             | 259081.65 | 249884.62 | 210817.38 | 148260.51 | 96442.24 | 56199.35 | 44510.10 | 32593.10 | 29450.52 | 24119.73 |
| 47 | 3-methylbutanal <sup>f</sup>             | 47167.42  | 35538.10  | 26043.79  | 21427.45  | 14254.87 | 11572.97 | 16711.39 | 17240.53 | 18423.33 | 18422.27 |
| 48 | 1-pentanol <sup>f</sup>                  | 1562.24   | 2660.78   | 3302.13   | 3296.45   | 1658.08  | 682.12   | 177.03   | nd       | nd       | nd       |
| 49 | ethyl oleate <sup>f</sup>                | 17246.43  | 2804.83   | 2985.25   | 750.77    | 109.77   | nd       | nd       | nd       | nd       | nd       |
| 50 | ethyl hexadecanoate <sup>f</sup>         | 43893.85  | 8551.01   | 9961.14   | 2943.05   | 1599.92  | 3224.96  | 3851.37  | 1800.61  | 1357.59  | 4224.10  |
| 51 | 3-hydroxybutan-2-one <sup>f</sup>        | 3912.64   | 3747.08   | 9229.27   | 11522.84  | 15435.26 | 21372.54 | 23231.50 | 24640.94 | 27065.67 | 21280.53 |
| 52 | 2,3,5-trimethylpyrazine <sup>f</sup>     | 765.60    | 1422.62   | 2310.32   | 4960.84   | 4321.46  | 2150.09  | 752.17   | 1599.89  | 1211.12  | 2296.18  |
| 53 | 2,3,5,6-tetramethylpyrazine <sup>f</sup> | 410.38    | 918.11    | 1279.15   | 2639.19   | 3443.14  | 3713.25  | 4384.03  | 5314.25  | 7000.22  | 5747.23  |
| 54 | 4-methylphenol <sup>s</sup>              | nd        | nd        | nd        | nd        | 596.91   | 1062.29  | 1177.04  | 2337.21  | 2580.40  | 2631.95  |
| 55 | 2-methoxy-4-methylphenol <sup>s</sup>    | nd        | nd        | nd        | nd        | 172.34   | 691.43   | 1103.27  | 1957.20  | 2094.64  | 1666.69  |
| 56 | 4-ethyl-2-methoxyphenol <sup>s</sup>     | nd        | nd        | nd        | nd        | 147.99   | 284.99   | 1506.63  | 2009.41  | 2299.79  | 2346.09  |
| 57 | phenol <sup>s</sup>                      | nd        | nd        | nd        | 0.22      | 0.36     | 1.97     | 3.67     | 4.95     | 4.54     | 4.44     |
| 58 | dimethyl trisulfide <sup>s</sup>         | 74.77     | 61.21     | 57.61     | 70.21     | 44.27    | 22.42    | nd       | nd       | nd       | nd       |

<sup>a</sup>ethanol means alcohol content (ABV, %). <sup>f</sup>Quantified by GC-FID. <sup>s</sup>Quantified by HS-SPME-GC-MS. nd: no detected.

Table S2. Cut points in distillation recipes of 2,3,5,6-tetramethylpyrazine with other aroma compounds

| Optimization objects     | First cut/min | Second cut/min | 2,3,5,6-tetramethylpyrazine recovery/% | Other aroma compounds recovery/% |
|--------------------------|---------------|----------------|----------------------------------------|----------------------------------|
| 3-methylbutanol          | 2.8           | 17.3           | 12.29                                  | 14.24                            |
| 1,1-diethoxyethane       | 3.9           | 19.8           | 14.53                                  | 44.56                            |
| ethyl acetate            | 0.2           | 11.4           | 8.24                                   | 49.02                            |
| dimethyl trisulfide      | 2.6           | 17.1           | 12.08                                  | 45.73                            |
| propanoic acid           | 3.4           | 18.8           | 13.64                                  | 15.66                            |
| 2-phenylethanol          | 3.2           | 18.2           | 13.15                                  | 15.06                            |
| benzaldehyde             | 3.6           | 19.4           | 14.15                                  | 16.25                            |
| ethyl 3-phenylpropanoate | 0.9           | 13.2           | 9.33                                   | 14.31                            |
| 3-hydroxybutan-2-one     | 3.1           | 17.8           | 12.69                                  | 15.23                            |
| phenol                   | 3.3           | 18.5           | 13.39                                  | 6.88                             |
